# Supplementary material for: HIV-associated gut microbial alterations are dependent on host and geographic context
Source: PubMed Central journal article supplement (PMC10844288; doi:10.1038/s41467-023-44566-4), 2024-02-05
Supplement: 41467_2023_44566_MOESM1_ESM.pdf [file 41467_2023_44566_MOESM1_ESM.pdf]

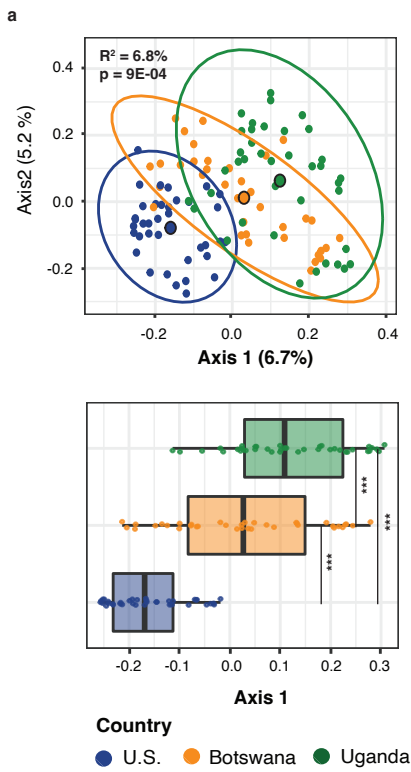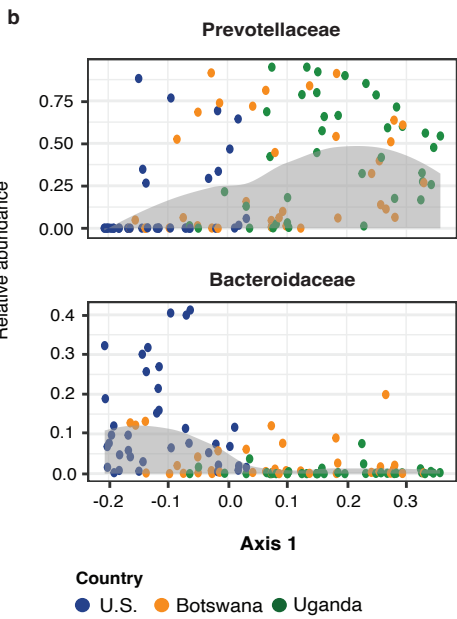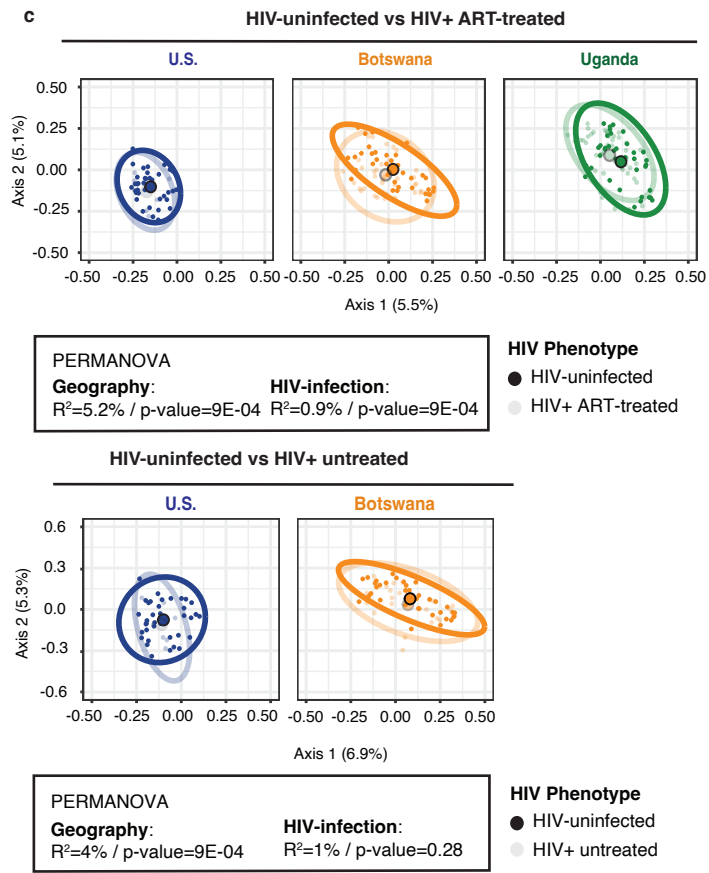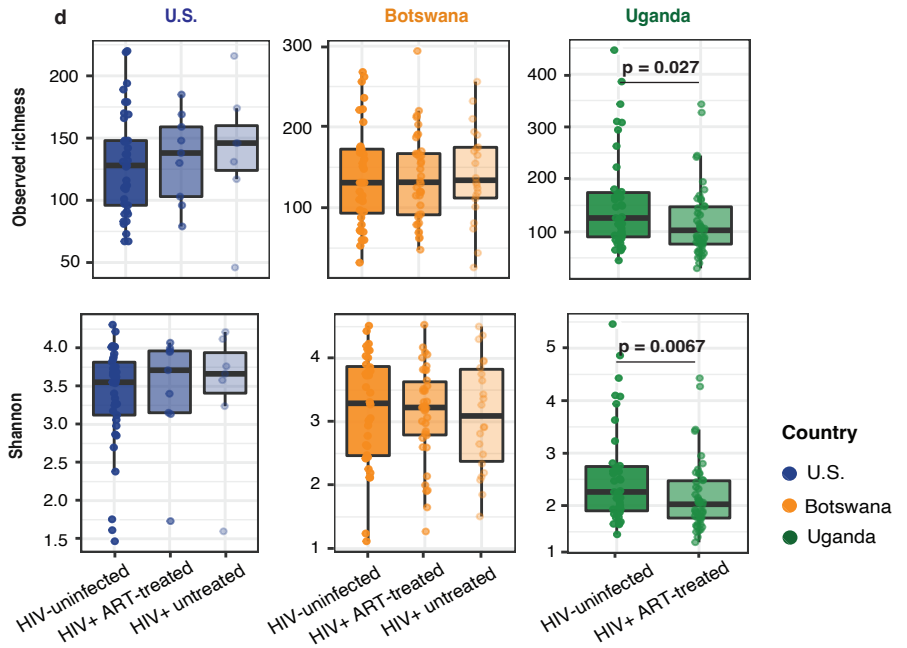

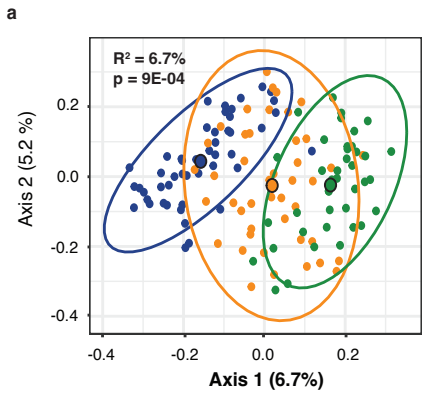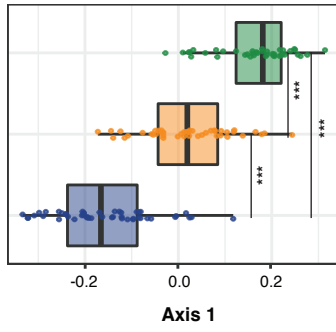

**Country**  
● U.S. ● Botswana ● Uganda

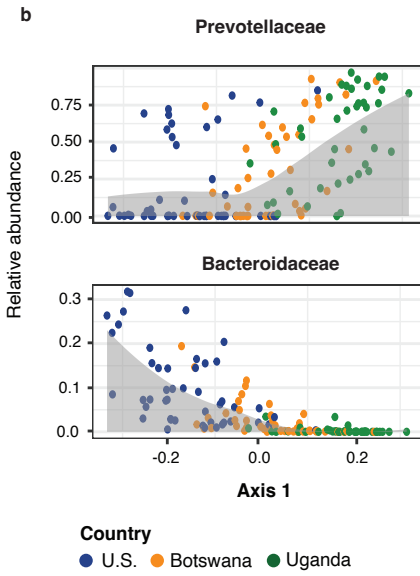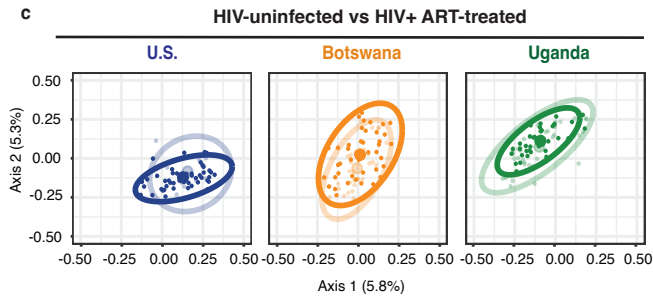

PERMANOVA  
**Geography:**  $R^2=5.6\%$  /  $p\text{-value}=9E-04$  **HIV-infection:**  $R^2=1$  /  $p\text{-value}=9E-04$

**HIV Phenotype**  
● HIV-uninfected  
● HIV+ ART-treated

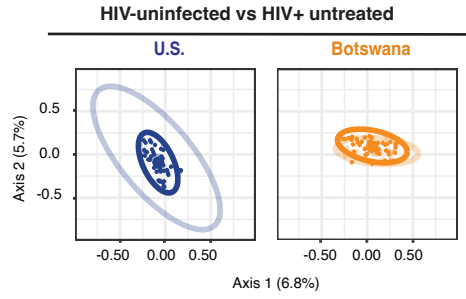

PERMANOVA  
**Geography:**  $R^2=3.8\%$  /  $p\text{-value}=9E-04$  **HIV-infection:**  $R^2=1.2$  /  $p\text{-value}=0.016$

**HIV Phenotype**  
● HIV-uninfected  
● HIV+ untreated

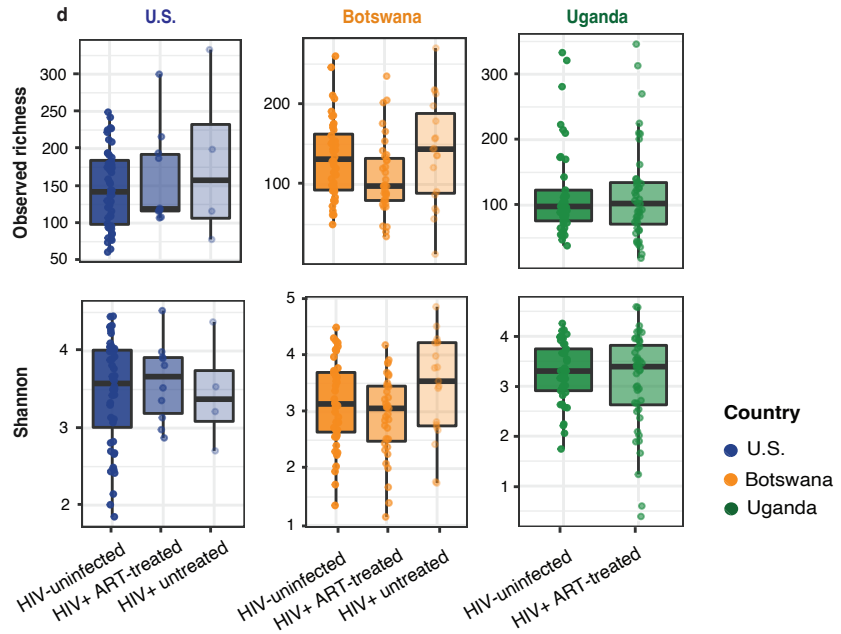

U.S.

Botswana

Uganda

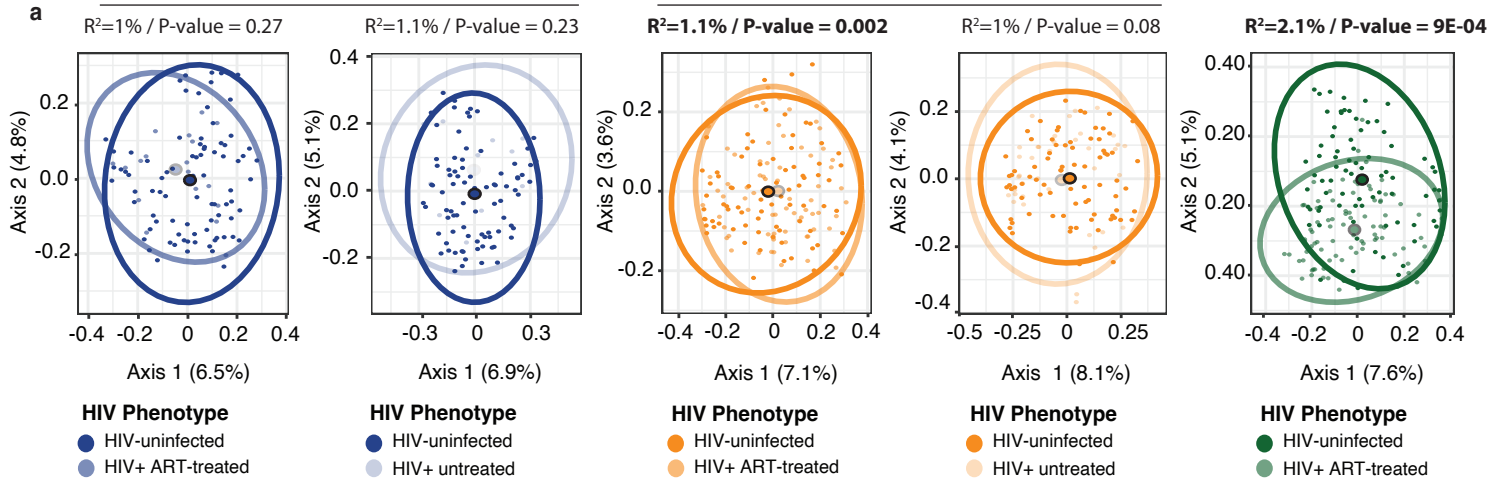

**b**

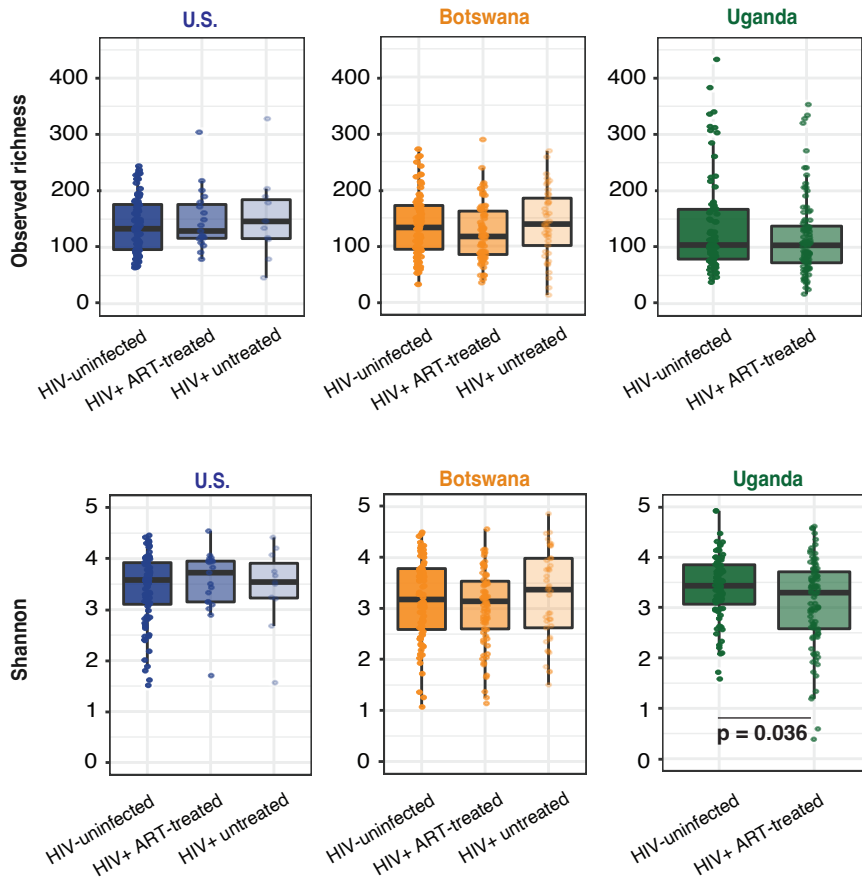

**a) BOTSWANA**

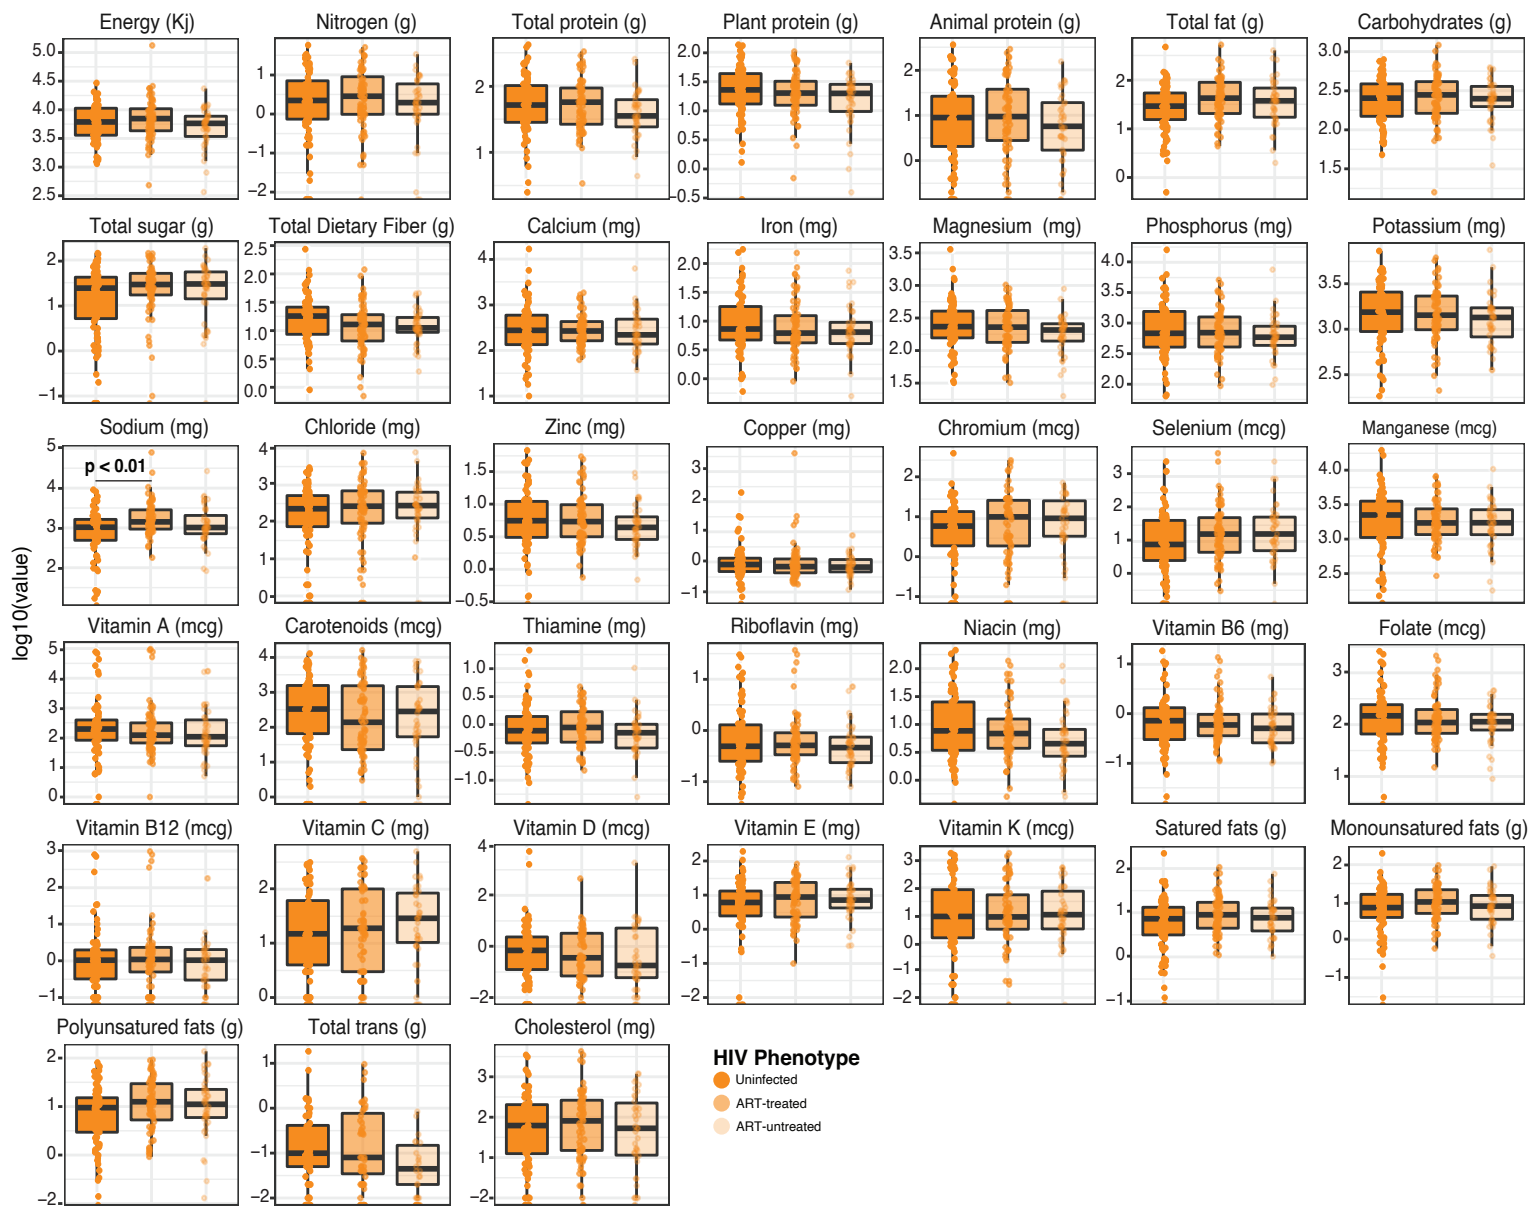

**b) U.S.**

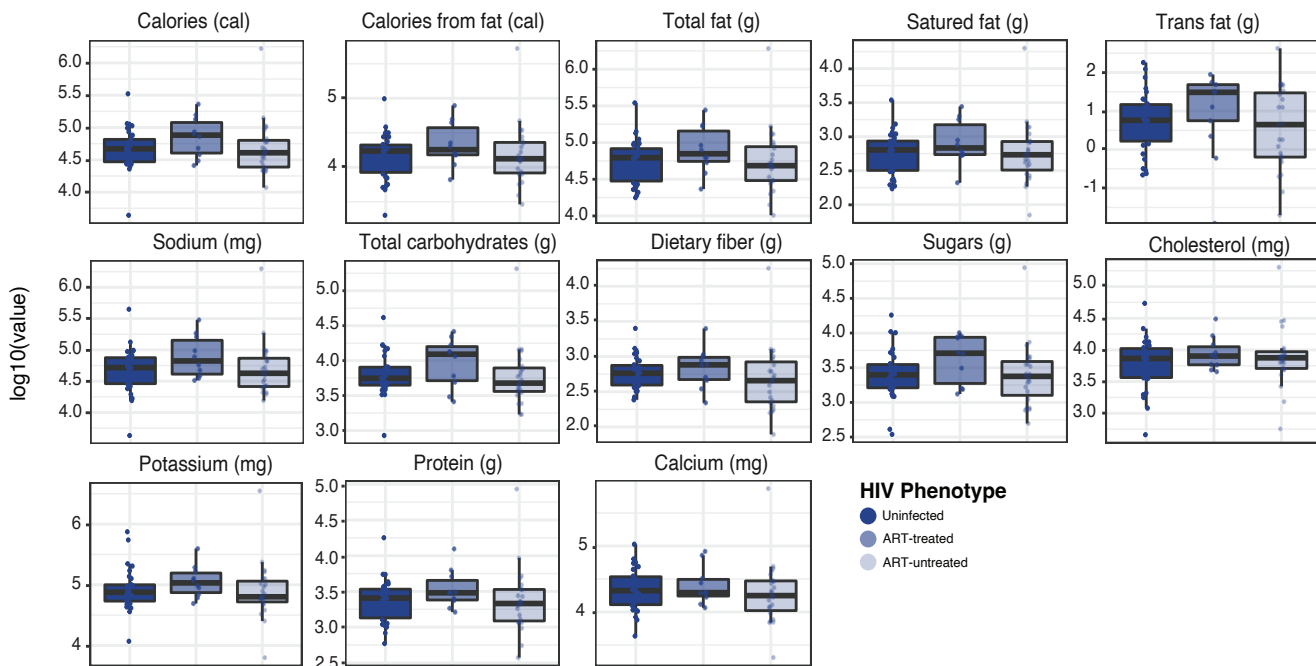

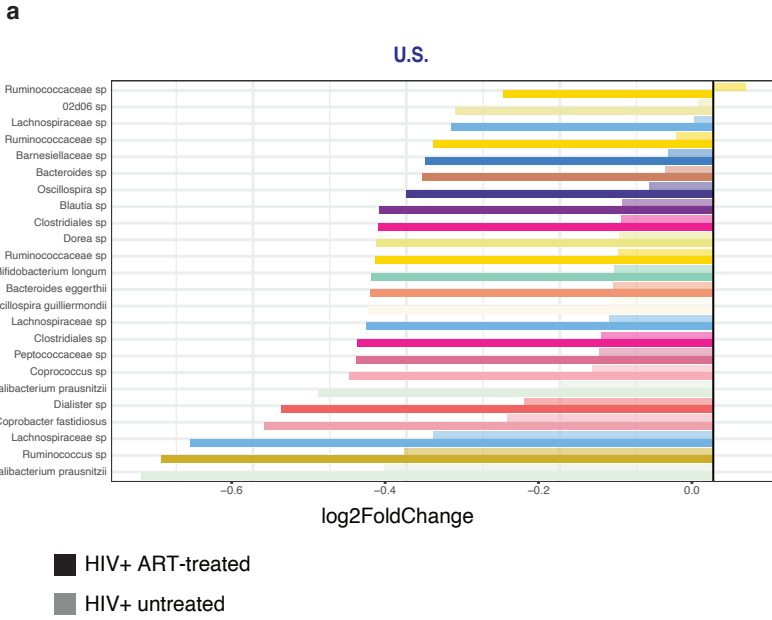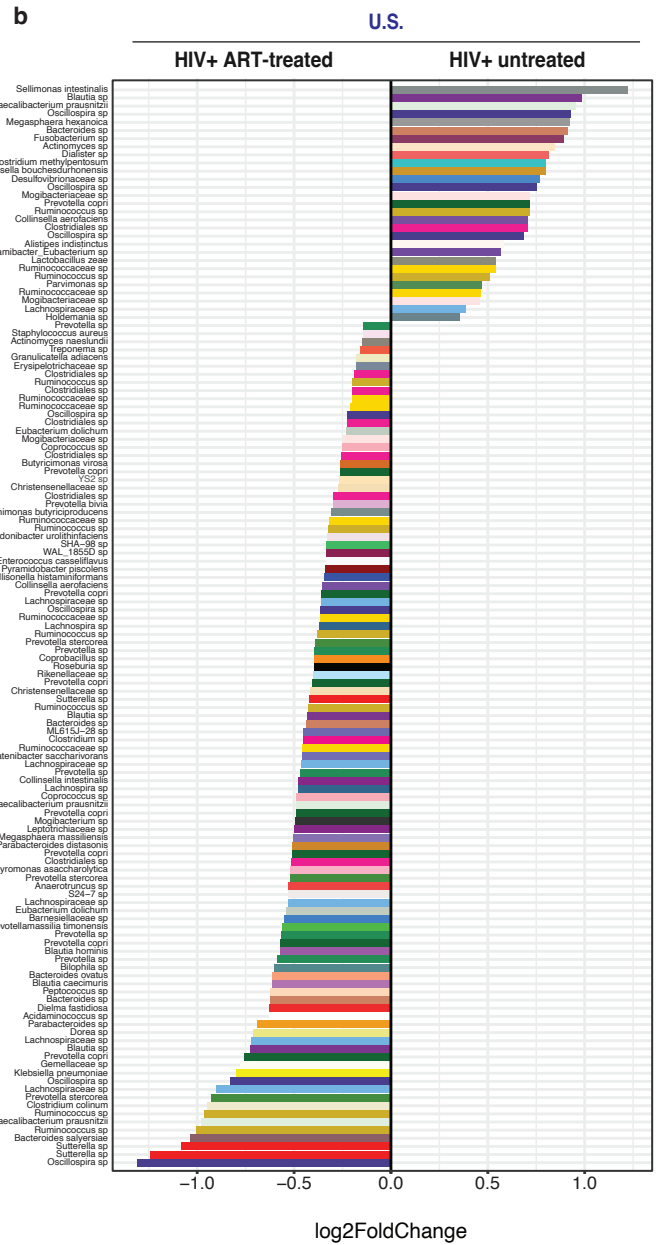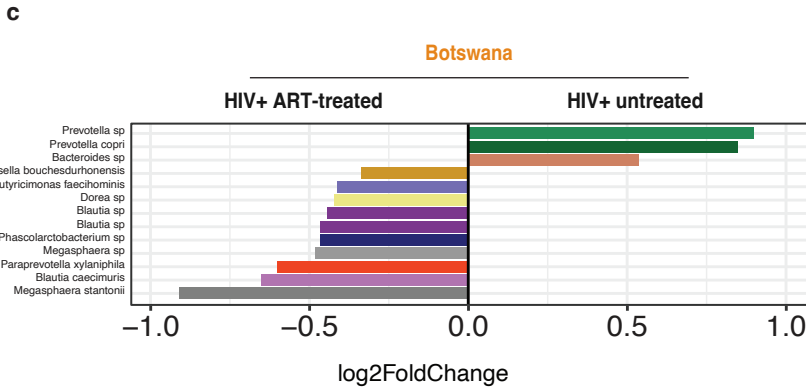

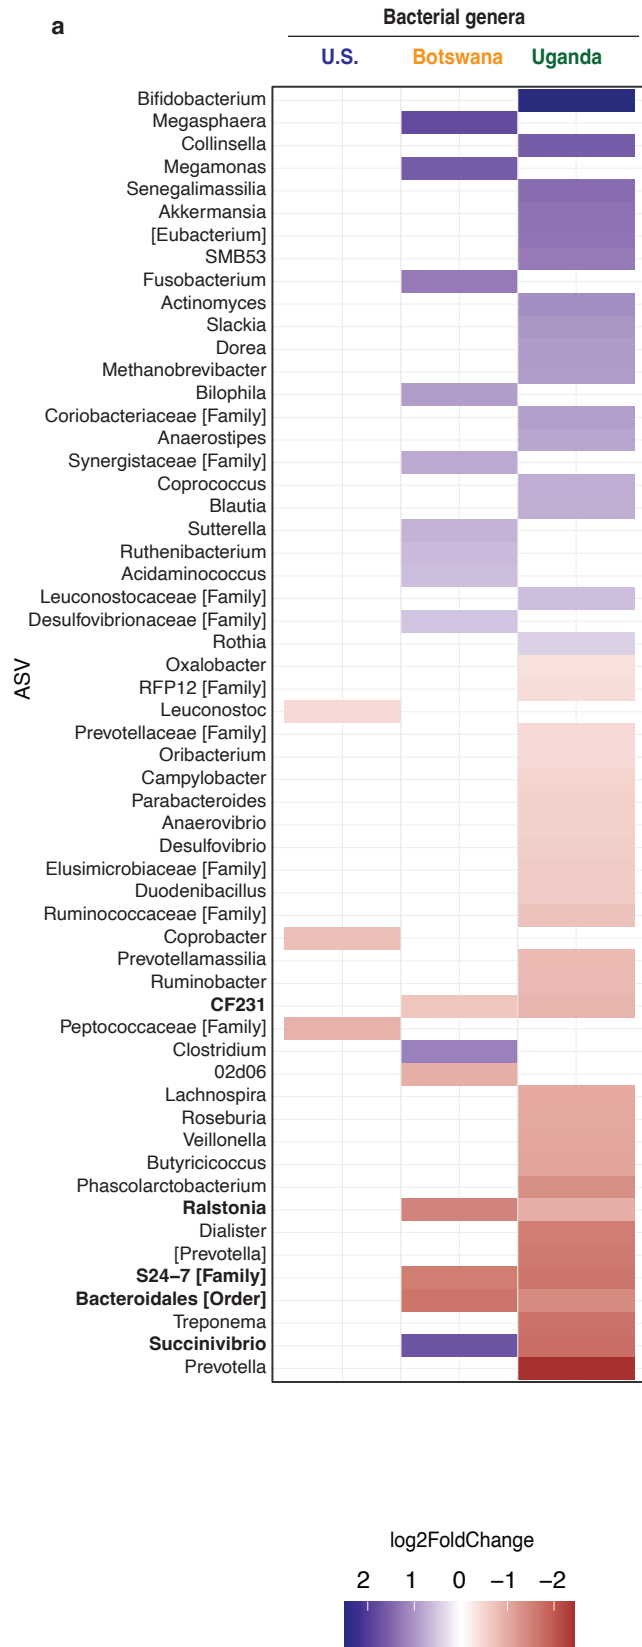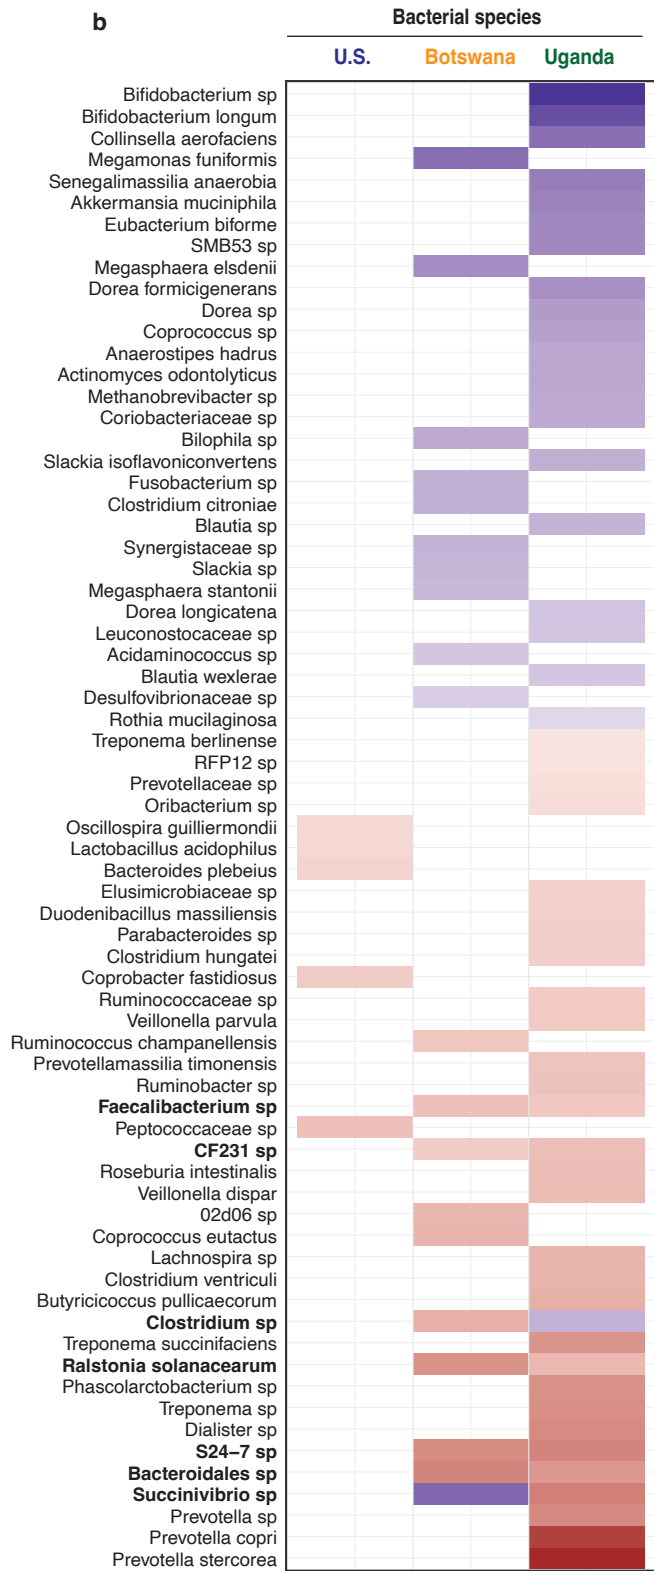

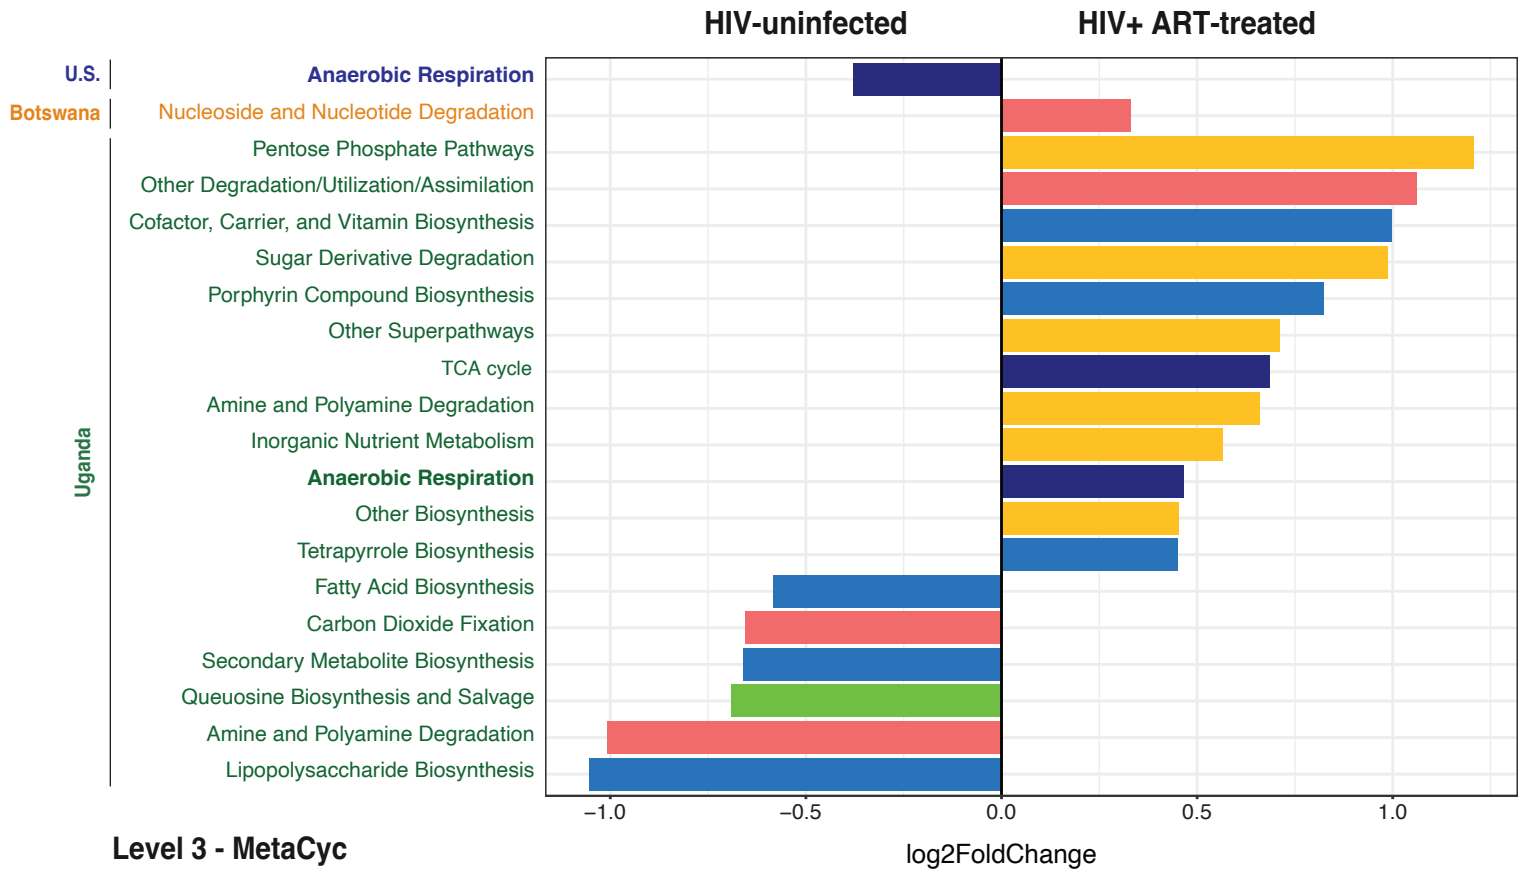

**Level 3 - MetaCyc**

- Degradation/Utilization/Assimilation
- Generation of precursor metabolites and energy
- Superpathways
- Biosynthesis
- Macromolecule modification

**Supplementary Table 1. Additional metadata correlation (HIV-uninfected)**

|                                                                        | HIV-uninfected                      |           |                                                 |           |
|------------------------------------------------------------------------|-------------------------------------|-----------|-------------------------------------------------|-----------|
|                                                                        | All metadata available<br>(n = 245) |           | All expanded metadata<br>available<br>(n = 231) |           |
|                                                                        | R <sup>2</sup>                      | P         | R <sup>2</sup>                                  | P         |
| Geography                                                              | 2.55%                               | 0.0009*** | 2.22%                                           | 0.0009*** |
| Sex                                                                    | 0.58%                               | 0.004**   | 0.50%                                           | 0.0009*** |
| Age                                                                    | 1.07%                               | 0.0009*** | 0.75%                                           | 0.0009*** |
| Race                                                                   | 3.06%                               | 0.0009*** | 2.28%                                           | 0.0009*** |
| Ethnicity                                                              | 0.46%                               | 0.09      | 0.31%                                           | 0.025*    |
| BMI                                                                    | -                                   | -         | 0.75%                                           | 0.0009*** |
| History of CVD (self-reported)                                         | -                                   | -         | 0.42%                                           | 0.34      |
| History of CVD (self-reported or determined from available data)       | -                                   | -         | 0.68%                                           | 0.002**   |
| History of HLD (self-reported)                                         | -                                   | -         | 0.43%                                           | 0.30      |
| History of HLD (self-reported or determined from available data)       | -                                   | -         | 0.64%                                           | 0.006**   |
| History of hypertension (self-reported)                                | -                                   | -         | 0.80%                                           | 0.0009*** |
| History of Type 2 DM (self-reported or determined from available data) | -                                   | -         | 0.51%                                           | 0.06      |

Controlling for available metadata from Figure 1A (HIV-uninfected, all geographic cohorts) performed on unweighted UniFrac distances calculated at the ASV level. R<sup>2</sup> and p-value were obtained for each category of metadata available using a multivariate PERMANOVA analysis. When adding in metadata available for all subjects and metadata available for a substantial fraction of subjects, geography remained significantly associated with fecal microbial community. Metadata coding is defined in Supplementary Data 1. \*\*\*: p < 0.001, \*\*: p < 0.01, \*: p < 0.05



**Supplementary Table 2. Additional metadata correlation (female-only, HIV-uninfected)**

|                                                                        | HIV-uninfected                      |           |                                                 |           |
|------------------------------------------------------------------------|-------------------------------------|-----------|-------------------------------------------------|-----------|
|                                                                        | All metadata available<br>(n = 112) |           | All expanded metadata<br>available<br>(n = 103) |           |
|                                                                        | R <sup>2</sup>                      | P         | R <sup>2</sup>                                  | P         |
| Geography                                                              | 3.69%                               | 0.0009*** | 3.17%                                           | 0.0009*** |
| Age                                                                    | 1.99%                               | 0.0009*** | 1.57%                                           | 0.002**   |
| Race                                                                   | 4.82%                               | 0.0009*** | 4.14%                                           | 0.0009*** |
| Ethnicity                                                              | 0.97%                               | 0.12      | 1.10%                                           | 0.094     |
| BMI                                                                    | -                                   | -         | 0.98%                                           | 0.29      |
| History of CVD (self-reported)                                         | -                                   | -         | 1.04%                                           | 0.16      |
| History of CVD (self-reported or determined from available data)       | -                                   | -         | 1.45%                                           | 0.004**   |
| History of HLD (self-reported)                                         | -                                   | -         | 1.11%                                           | 0.078     |
| History of HLD (self-reported or determined from available data)       | -                                   | -         | 1.34%                                           | 0.008**   |
| History of hypertension (self-reported)                                | -                                   | -         | 1.72%                                           | 0.0009*** |
| History of Type 2 DM (self-reported or determined from available data) | -                                   | -         | 1.22%                                           | 0.023*    |

Controlling for available metadata from Supplementary Figure 1A (female-only, HIV-uninfected subjects) performed on unweighted UniFrac distances calculated at the ASV level. R<sup>2</sup> and p-value were obtained for each category of metadata available using a multivariate PERMANOVA analysis. When adding in metadata available for all subjects and metadata available for a substantial fraction of subjects, geography remained significantly associated with microbiome structure. Metadata coding is defined in Supplementary Data 1. CVD (cardiovascular disease), HLD (hyperlipidemia), DM (diabetes mellitus). \*\*\*: p < 0.001, \*\*: p < 0.01, \*: p < 0.05

**Supplementary Table 3. Additional metadata correlation (male-only analysis, HIV-uninfected)**

|                                                                        | HIV-uninfected                      |           |                                                 |           |
|------------------------------------------------------------------------|-------------------------------------|-----------|-------------------------------------------------|-----------|
|                                                                        | All metadata available<br>(n = 133) |           | All expanded metadata<br>available<br>(n = 128) |           |
|                                                                        | R <sup>2</sup>                      | P         | R <sup>2</sup>                                  | P         |
| Geography                                                              | 3.09%                               | 0.0009*** | 2.93%                                           | 0.0009*** |
| Age                                                                    | 1.30%                               | 0.0009*** | 1.33%                                           | 0.0009*** |
| Race                                                                   | 5.63%                               | 0.0009*** | 3.90%                                           | 0.0009*** |
| Ethnicity                                                              | 0.80%                               | 0.18      | 0.74%                                           | 0.40      |
| BMI                                                                    | -                                   | -         | 2.20%                                           | 0.0009*** |
| History of CVD (self-reported)                                         | -                                   | -         | 0.81%                                           | 0.19      |
| History of CVD (self-reported or determined from available data)       | -                                   | -         | 1.30%                                           | 0.002**   |
| History of HLD (self-reported)                                         | -                                   | -         | 0.74%                                           | 0.45      |
| History of HLD (self-reported or determined from available data)       | -                                   | -         | 0.95%                                           | 0.035*    |
| History of hypertension (self-reported)                                | -                                   | -         | 0.80%                                           | 0.24      |
| History of Type 2 DM (self-reported or determined from available data) | -                                   | -         | 0.85%                                           | 0.11      |

Controlling for available metadata from Supplementary Figure 2A (male-only, HIV-uninfected subjects) performed on unweighted UniFrac distances calculated at the ASV level. R<sup>2</sup> and p-value were obtained for each category of metadata available using a multivariate PERMANOVA analysis. When adding in metadata available for all subjects and metadata available for a substantial fraction of subjects, geography remained significantly associated with microbiome structure. Metadata coding is defined in Supplementary Data 1. CVD (cardiovascular disease), HLD (hyperlipidemia), DM (diabetes mellitus). \*\*\*: p < 0.001, \*\*: p < 0.01, \*: p < 0.05

**Supplementary Table 4. Differentially abundant bacterial species between HIV-uninfected individuals in the U.S., Botswana, and Uganda.**

| Species name                            | RA (mean ± sd) | Species name                            | RA (mean ± sd) | Species name                            | RA (mean ± sd) |
|-----------------------------------------|----------------|-----------------------------------------|----------------|-----------------------------------------|----------------|
| <i>Prevotella copri</i>                 | 0.143 ± 0.249  | <i>Prevotella copri</i>                 | 0.192 ± 0.286  | <i>Prevotella copri</i>                 | 0.373 ± 0.293  |
| <i>Faecalibacterium prausnitzii</i>     | 0.125 ± 0.088  | <i>Prevotella unclassified</i>          | 0.082 ± 0.159  | <i>Faecalibacterium prausnitzii</i>     | 0.073 ± 0.053  |
| <i>Blautia wexlerae</i>                 | 0.071 ± 0.066  | <i>Bifidobacterium longum</i>           | 0.081 ± 0.146  | <i>Prevotella unclassified</i>          | 0.062 ± 0.079  |
| <i>Akkermansia muciniphila</i>          | 0.070 ± 0.162  | <i>Faecalibacterium prausnitzii</i>     | 0.074 ± 0.068  | <i>Bifidobacterium longum</i>           | 0.048 ± 0.139  |
| <i>Blautia unclassified</i>             | 0.065 ± 0.054  | <i>Blautia wexlerae</i>                 | 0.063 ± 0.091  | <i>Blautia wexlerae</i>                 | 0.040 ± 0.050  |
| <i>Bifidobacterium longum</i>           | 0.049 ± 0.102  | <i>Bifidobacterium unclassified</i>     | 0.056 ± 0.117  | <i>S24-7 unclassified</i>               | 0.037 ± 0.072  |
| <i>Bacteroides vulgatus</i>             | 0.036 ± 0.053  | <i>Akkermansia muciniphila</i>          | 0.040 ± 0.105  | <i>Blautia unclassified</i>             | 0.034 ± 0.046  |
| <i>Bifidobacterium unclassified</i>     | 0.033 ± 0.109  | <i>Blautia unclassified</i>             | 0.034 ± 0.032  | <i>Ruminococcaceae unclassified</i>     | 0.026 ± 0.031  |
| <i>Lachnospiraceae unclassified</i>     | 0.027 ± 0.022  | <i>S24-7 unclassified</i>               | 0.033 ± 0.079  | <i>Akkermansia muciniphila</i>          | 0.021 ± 0.092  |
| <i>Fusicatenibacter saccharivorans</i>  | 0.024 ± 0.028  | <i>Ruminococcaceae unclassified</i>     | 0.030 ± 0.051  | <i>Prevotella stercorea</i>             | 0.017 ± 0.020  |
| <i>Bacteroides unclassified</i>         | 0.019 ± 0.028  | <i>Prevotella stercorea</i>             | 0.022 ± 0.068  | <i>Lachnospiraceae unclassified</i>     | 0.017 ± 0.025  |
| <i>Coprococcus unclassified</i>         | 0.016 ± 0.014  | <i>Lachnospiraceae unclassified</i>     | 0.019 ± 0.019  | <i>Bifidobacterium unclassified</i>     | 0.015 ± 0.045  |
| <i>Prevotella stercorea</i>             | 0.016 ± 0.069  | <i>Fusicatenibacter saccharivorans</i>  | 0.017 ± 0.036  | <i>Clostridium celatum</i>              | 0.012 ± 0.0037 |
| <i>Bacteroides uniformis</i>            | 0.015 ± 0.023  | <i>Ruminococcus bromii</i>              | 0.016 ± 0.026  | <i>Coriobacteriaceae unclassified</i>   | 0.011 ± 0.020  |
| <i>Ruminococcaceae unclassified</i>     | 0.011 ± 0.012  | <i>[Ruminococcus] unclassified</i>      | 0.008 ± 0.011  | <i>Coprococcus unclassified</i>         | 0.008 ± 0.010  |
| <i>[Ruminococcus] unclassified</i>      | 0.010 ± 0.012  | <i>Coprococcus unclassified</i>         | 0.005 ± 0.007  | <i>Ruminococcus bromii</i>              | 0.007 ± 0.012  |
| <i>Bacteroides ovatus</i>               | 0.010 ± 0.014  | <i>Bacteroides unclassified</i>         | 0.005 ± 0.012  | <i>Fusicatenibacter saccharivorans</i>  | 0.007 ± 0.012  |
| <i>Rikenellaceae unclassified</i>       | 0.008 ± 0.017  | <i>Bacteroides vulgatus</i>             | 0.004 ± 0.010  | <i>[Ruminococcus] unclassified</i>      | 0.006 ± 0.009  |
| <i>Prevotella unclassified</i>          | 0.008 ± 0.033  | <i>Dorea longicatena</i>                | 0.004 ± 0.005  | <i>Dorea longicatena</i>                | 0.004 ± 0.006  |
| <i>Ruminococcus bromii</i>              | 0.008 ± 0.015  | <i>Bacteroides uniformis</i>            | 0.004 ± 0.008  | <i>Senegalimassilia anaerobia</i>       | 0.004 ± 0.014  |
| <i>Anaerostipes hadrus</i>              | 0.007 ± 0.008  | <i>Dorea unclassified</i>               | 0.004 ± 0.007  | <i>Dorea unclassified</i>               | 0.003 ± 0.007  |
| <i>Dorea unclassified</i>               | 0.007 ± 0.008  | <i>Erysipelotrichaceae unclassified</i> | 0.003 ± 0.017  | <i>Streptococcus thermophilus</i>       | 0.002 ± 0.006  |
| <i>Dorea longicatena</i>                | 0.007 ± 0.007  | <i>Lachnospira unclassified</i>         | 0.003 ± 0.008  | <i>Erysipelotrichaceae unclassified</i> | 0.002 ± 0.014  |
| <i>Lachnospira unclassified</i>         | 0.007 ± 0.010  | <i>Parabacteroides unclassified</i>     | 0.002 ± 0.006  | <i>Anaerostipes hadrus</i>              | 0.002 ± 0.006  |
| <i>Parabacteroides distasonis</i>       | 0.005 ± 0.008  | <i>Bacteroides ovatus</i>               | 0.002 ± 0.004  | <i>Lachnospira unclassified</i>         | 0.002 ± 0.003  |
| <i>Parabacteroides unclassified</i>     | 0.004 ± 0.008  | <i>Streptococcus thermophilus</i>       | 0.002 ± 0.007  | <i>Catenibacterium mitsuokai</i>        | 0.002 ± 0.005  |
| <i>S24-7 unclassified</i>               | 0.003 ± 0.010  | <i>Anaerostipes hadrus</i>              | 0.001 ± 0.002  | <i>[Mogibacteriaceae] unclassified</i>  | 0.001 ± 0.003  |
| <i>Streptococcus thermophilus</i>       | 0.003 ± 0.010  | <i>Coprococcus eutactus</i>             | 0.001 ± 0.002  | <i>Coprococcus eutactus</i>             | 0.001 ± 0.003  |
| <i>Bilophila unclassified</i>           | 0.003 ± 0.004  | <i>[Mogibacteriaceae] unclassified</i>  | 0.001 ± 0.001  | <i>Clostridium unclassified</i>         | 0.001 ± 0.004  |
| <i>Erysipelotrichaceae unclassified</i> | 0.002 ± 0.005  | <i>Catenibacterium mitsuokai</i>        | 0.001 ± 0.003  | <i>Bacteroides unclassified</i>         | 0.001 ± 0.004  |
| <i>Clostridium unclassified</i>         | 0.002 ± 0.004  | <i>Clostridium unclassified</i>         | 0.001 ± 0.002  | <i>Parabacteroides unclassified</i>     | 0.001 ± 0.002  |
| <i>Coprococcus eutactus</i>             | 0.002 ± 0.006  | <i>Clostridium celatum</i>              | 0.001 ± 0.003  | <i>Bacteroides vulgatus</i>             | 0.000 ± 0.003  |
| <i>[Mogibacteriaceae] unclassified</i>  | 0.001 ± 0.002  | <i>Coriobacteriaceae unclassified</i>   | 0.001 ± 0.001  | <i>Bacteroides ovatus</i>               | 0.000 ± 0.001  |
| <i>Coriobacteriaceae unclassified</i>   | 0.001 ± 0.002  | <i>Bilophila unclassified</i>           | 0.000 ± 0.001  | <i>Rikenellaceae unclassified</i>       | 0.000 ± 0.000  |
| <i>Catenibacterium mitsuokai</i>        | 0.001 ± 0.003  | <i>Senegalimassilia anaerobia</i>       | 0.000 ± 0.000  | <i>Bacteroides uniformis</i>            | 0.000 ± 0.000  |
| <i>Senegalimassilia anaerobia</i>       | 0.00 ± 0.002   | <i>Parabacteroides distasonis</i>       | 0.000 ± 0.001  | <i>Parabacteroides distasonis</i>       | 0.000 ± 0.000  |
| <i>Clostridium celatum</i>              | 0.00 ± 0.001   | <i>Rikenellaceae unclassified</i>       | 0.001 ± 0.001  | <i>Bilophila unclassified</i>           | 0.000 ± 0.000  |

RA = Relative Abundance

Relative abundance of the bacterial species with a differential abundance in HIV-uninfected individuals between cohorts (Kruskal-Wallis test with Bonferroni multiple comparison correction p-value<0.05) (Figure 1C). In each cohort, bacterial species are ordered from most to least abundant and color-code highlights the top 5 most abundant species in all three cohorts.

**Supplementary Table 5. Additional metadata correlation (non-MSM, all geographic cohorts)**

|                                                                        | HIV-uninfected vs HIV+ ART-treated |           |                                           |           | HIV-uninfected vs HIV+ untreated |           |                                           |           |
|------------------------------------------------------------------------|------------------------------------|-----------|-------------------------------------------|-----------|----------------------------------|-----------|-------------------------------------------|-----------|
|                                                                        | All metadata available (n = 427)   |           | All expanded metadata available (n = 405) |           | All metadata available (n = 217) |           | All expanded metadata available (n = 201) |           |
|                                                                        | R <sup>2</sup>                     | P         | R <sup>2</sup>                            | P         | R <sup>2</sup>                   | P         | R <sup>2</sup>                            | P         |
| Geography                                                              | 1.73%                              | 0.0009*** | 1.45%                                     | 0.0009*** | 1.03%                            | 0.0009*** | 0.87%                                     | 0.002**   |
| HIV-Infection                                                          | 0.63%                              | 0.0009*** | 0.46%                                     | 0.0009*** | 0.57%                            | 0.041*    | 0.56%                                     | 0.12      |
| Sex                                                                    | 0.40%                              | 0.0009*** | 0.50%                                     | 0.0009*** | 0.54%                            | 0.096     | 0.59%                                     | 0.062     |
| Age                                                                    | 0.86%                              | 0.0009*** | 0.75%                                     | 0.0009*** | 0.73%                            | 0.003**   | 1.16%                                     | 0.0009*** |
| Race                                                                   | 3.06%                              | 0.0009*** | 2.28%                                     | 0.0009*** | 2.07%                            | 0.022*    | 3.55%                                     | 0.0009*** |
| Ethnicity                                                              | 0.29%                              | 0.024*    | 0.31%                                     | 0.025*    | 0.41%                            | 0.68      | 0.54%                                     | 0.14      |
| Current ART (by class)                                                 | 0.89%                              | 0.0009*** | 0.98%                                     | 0.0009*** | -                                | -         | -                                         | -         |
| On TMP-SMX Prophylaxis                                                 | 0.94%                              | 0.0009*** | 0.64%                                     | 0.0009*** | -                                | -         | -                                         | -         |
| BMI                                                                    | -                                  | -         | 0.62%                                     | 0.0009*** | -                                | -         | 0.71%                                     | 0.007**   |
| Time on ART (years)                                                    | -                                  | -         | 0.59%                                     | 0.0009*** | -                                | -         | -                                         | -         |
| History of CVD (self-reported)                                         | -                                  | -         | 0.39%                                     | 0.0009*** | -                                | -         | 0.66%                                     | 0.016*    |
| History of CVD (self-reported or determined from available data)       | -                                  | -         | 0.43%                                     | 0.0009*** | -                                | -         | 0.67%                                     | 0.015*    |
| History of HLD (self-reported)                                         | -                                  | -         | 0.29%                                     | 0.058     | -                                | -         | 0.57%                                     | 0.12      |
| History of HLD (self-reported or determined from available data)       | -                                  | -         | 0.34%                                     | 0.008**   | -                                | -         | 0.79%                                     | 0.0009*** |
| History of hypertension (self-reported)                                | -                                  | -         | 0.33%                                     | 0.009**   | -                                | -         | 0.47%                                     | 0.48      |
| History of Type 2 DM (self-reported or determined from available data) | -                                  | -         | 0.28%                                     | 0.09      | -                                | -         | 0.52%                                     | 0.21      |

Controlling for available metadata from Figure 2A (non-MSM subjects, all geographic cohorts) performed on unweighted UniFrac distances calculated at the ASV level. R<sup>2</sup> and p-value were obtained for each category of metadata available using a multivariate PERMANOVA analysis. When adding in metadata available for all subjects and metadata available for a substantial fraction of subjects, both geography and HIV-infection status remained significant in the comparison between HIV-uninfected and HIV-infected ART-treated subjects, while HIV-infection status was no longer significant in the comparison between HIV-uninfected and HIV-infected ART-untreated subjects. Metadata coding is defined in Supplementary Data 1. ART (anti-retroviral therapy), TMP-SMX (trimethoprim-sulfamethoxazole), CVD (cardiovascular disease), HLD (hyperlipidemia), DM (diabetes mellitus). \*\*\*: p < 0.001, \*\*: p < 0.01, \*: p < 0.05

**Supplementary Table 6. Additional metadata correlation (female-only analysis)**

|                                                                        | HIV-uninfected vs HIV+ ART-treated |           |                                           |           | HIV-uninfected vs HIV+ untreated |           |                                          |           |
|------------------------------------------------------------------------|------------------------------------|-----------|-------------------------------------------|-----------|----------------------------------|-----------|------------------------------------------|-----------|
|                                                                        | All metadata available (n = 205)   |           | All expanded metadata available (n = 190) |           | All metadata available (n = 102) |           | All expanded metadata available (n = 91) |           |
|                                                                        | R <sup>2</sup>                     | P         | R <sup>2</sup>                            | P         | R <sup>2</sup>                   | P         | R <sup>2</sup>                           | P         |
| Geography                                                              | 2.29%                              | 0.0009*** | 1.90%                                     | 0.0009*** | 2.03%                            | 0.0009*** | 1.64%                                    | 0.005**   |
| HIV-Infection                                                          | 0.86%                              | 0.0009*** | 0.88%                                     | 0.0009*** | 0.97%                            | 0.39      | 1.04%                                    | 0.51      |
| Age                                                                    | 1.24%                              | 0.0009*** | 1.19%                                     | 0.0009*** | 1.36%                            | 0.013*    | 1.35%                                    | 0.049*    |
| Race                                                                   | 3.79%                              | 0.0009*** | 2.97%                                     | 0.0009*** | 5.78%                            | 0.0009*** | 5.86%                                    | 0.0009*** |
| Ethnicity                                                              | 0.59%                              | 0.034*    | 0.60%                                     | 0.068     | 0.98%                            | 0.37      | 1.04%                                    | 0.52      |
| Current ART (by class)                                                 | 1.45%                              | 0.31      | 1.46%                                     | 0.62      | -                                | -         | -                                        | -         |
| On TMP-SMX Prophylaxis                                                 | 1.16%                              | 0.0009*** | 0.84%                                     | 0.002**   | -                                | -         | -                                        | -         |
| BMI                                                                    | -                                  | -         | 0.61%                                     | 0.055     | -                                | -         | 0.98%                                    | 0.72      |
| Time on ART (years)                                                    | -                                  | -         | 0.84%                                     | 0.002**   | -                                | -         | -                                        | -         |
| History of CVD (self-reported)                                         | -                                  | -         | 0.65%                                     | 0.034*    | -                                | -         | 1.51%                                    | 0.015*    |
| History of CVD (self-reported or determined from available data)       | -                                  | -         | 0.83%                                     | 0.0009*** | -                                | -         | 1.09%                                    | 0.37      |
| History of HLD (self-reported)                                         | -                                  | -         | 0.68%                                     | 0.026*    | -                                | -         | 1.03%                                    | 0.52      |
| History of HLD (self-reported or determined from available data)       | -                                  | -         | 0.78%                                     | 0.002**   | -                                | -         | 1.66%                                    | 0.0009*** |
| History of hypertension (self-reported)                                | -                                  | -         | 0.82%                                     | 0.003**   | -                                | -         | 1.20%                                    | 0.17      |
| History of Type 2 DM (self-reported or determined from available data) | -                                  | -         | 0.63%                                     | 0.047*    | -                                | -         | 1.26%                                    | 0.09      |

Controlling for available metadata from Supplementary Figure 1C (female-only, all subjects) performed on unweighted UniFrac distances calculated at the ASV level. R<sup>2</sup> and p-value were obtained for each category of metadata available using a multivariate PERMANOVA analysis. When adding in metadata available for all subjects and metadata available for a substantial fraction of subjects, both geography and HIV-infection status remained significant in the comparison between HIV-uninfected and HIV-infected ART-treated subjects. In the comparison between HIV-uninfected and HIV-infected ART-untreated subjects, geography remained significant and HIV-infection status remained non-significant. Metadata coding is defined in Supplementary Data 1. ART (anti-retroviral therapy), TMP-SMX (trimethoprim-sulfamethoxazole), CVD (cardiovascular disease), HLD (hyperlipidemia), DM (diabetes mellitus). \*\*\*: p < 0.001, \*\*: p < 0.01, \*: p < 0.05

**Supplementary Table 7. Additional metadata correlation (male-only analysis)**

|                                                                        | HIV-uninfected vs HIV+ ART-treated |           |                                           |           | HIV-uninfected vs HIV+ untreated |           |                                           |           |
|------------------------------------------------------------------------|------------------------------------|-----------|-------------------------------------------|-----------|----------------------------------|-----------|-------------------------------------------|-----------|
|                                                                        | All metadata available (n = 222)   |           | All expanded metadata available (n = 215) |           | All metadata available (n = 115) |           | All expanded metadata available (n = 110) |           |
|                                                                        | R <sup>2</sup>                     | P         | R <sup>2</sup>                            | P         | R <sup>2</sup>                   | P         | R <sup>2</sup>                            | P         |
| Geography                                                              | 2.00%                              | 0.0009*** | 1.89%                                     | 0.0009*** | 1.12%                            | 0.037*    | 1.16%                                     | 0.03*     |
| HIV-Infection                                                          | 0.91%                              | 0.0009*** | 0.56%                                     | 0.03*     | 1.05%                            | 0.058     | 1.03%                                     | 0.11      |
| Age                                                                    | 1.10%                              | 0.0009*** | 0.93%                                     | 0.0009*** | 2.01%                            | 0.0009*** | 1.57%                                     | 0.002**   |
| Race                                                                   | 3.56%                              | 0.0009*** | 2.57%                                     | 0.0009*** | 4.70%                            | 0.0009*** | 4.38%                                     | 0.0009*** |
| Ethnicity                                                              | 0.46%                              | 0.25      | 0.43%                                     | 0.50      | 0.96%                            | 0.19      | 0.90%                                     | 0.37      |
| Current ART (by class)                                                 | 1.63%                              | 0.003**   | 1.70%                                     | 0.0009*** | -                                | -         | -                                         | -         |
| On TMP-SMX Prophylaxis                                                 | 1.16%                              | 0.0009*** | 0.90%                                     | 0.0009*** | -                                | -         | -                                         | -         |
| BMI                                                                    | -                                  | -         | 1.57%                                     | 0.0009*** | -                                | -         | 1.54%                                     | 0.002**   |
| Time on ART (years)                                                    | -                                  | -         | 0.87%                                     | 0.0009*** | -                                | -         | -                                         | -         |
| History of CVD (self-reported)                                         | -                                  | -         | 0.56%                                     | 0.034*    | -                                | -         | 1.06%                                     | 0.068     |
| History of CVD (self-reported or determined from available data)       | -                                  | -         | 0.85%                                     | 0.0009*** | -                                | -         | 1.03%                                     | 0.11      |
| History of HLD (self-reported)                                         | -                                  | -         | 0.45%                                     | 0.33      | -                                | -         | 0.84%                                     | 0.56      |
| History of HLD (self-reported or determined from available data)       | -                                  | -         | 0.63%                                     | 0.009**   | -                                | -         | 1.20%                                     | 0.024*    |
| History of hypertension (self-reported)                                | -                                  | -         | 0.42%                                     | 0.52      | -                                | -         | 0.79%                                     | 0.73      |
| History of Type 2 DM (self-reported or determined from available data) | -                                  | -         | 0.50%                                     | 0.14      | -                                | -         | 1.09%                                     | 0.065     |

Controlling for available metadata from Supplementary Figure 2C (male-only, all subjects) performed on unweighted UniFrac distances calculated at the ASV level. R<sup>2</sup> and p-value were obtained for each category of metadata available using a multivariate PERMANOVA analysis. When adding in metadata available for all subjects and metadata available for a substantial fraction of subjects, both geography and HIV-infection status remained significant in the comparison between HIV-uninfected and HIV-infected ART-treated subjects. In the comparison between HIV-uninfected and HIV-infected ART-untreated subjects, geography remained significant while HIV-infection status was no longer significant. Metadata coding is defined in Supplementary Data 1. ART (anti-retroviral therapy), TMP-SMX (trimethoprim-sulfamethoxazole), CVD (cardiovascular disease), HLD (hyperlipidemia), DM (diabetes mellitus). \*\*\*: p < 0.001, \*\*: p < 0.01, \*: p < 0.05

**Supplementary Table 8. Additional metadata correlation (Boston)**

|                        | HIV-uninfected vs HIV+ ART-treated  |           | HIV-uninfected vs HIV+ untreated   |           |
|------------------------|-------------------------------------|-----------|------------------------------------|-----------|
|                        | All metadata available<br>(n = 104) |           | All metadata available<br>(n = 96) |           |
|                        | R <sup>2</sup>                      | P         | R <sup>2</sup>                     | P         |
| HIV-Infection          | 0.86%                               | 0.79      | 0.98%                              | 0.61      |
| Sex                    | 1.20%                               | 0.043*    | 1.25%                              | 0.08      |
| Age                    | 1.96%                               | 0.0009*** | 1.92%                              | 0.0009*** |
| Race                   | 4.89%                               | 0.32      | 4.88%                              | 0.019*    |
| Ethnicity              | 1.13%                               | 0.075     | 1.05%                              | 0.39      |
| Current ART (by class) | 3.25%                               | 0.058     | -                                  | -         |

Controlling for available from Supplementary Figure 3A (non-MSM subjects, Boston) performed on unweighted UniFrac distances calculated at the ASV level. R<sup>2</sup> and p-value were obtained for each category of metadata available using a multivariate PERMANOVA analysis. When adding in metadata available for all subjects HIV-infection status remained non-significant in both the comparison between HIV-uninfected and HIV-infected ART-treated subjects, and in the comparison between HIV-uninfected and HIV-infected ART-untreated subjects. Metadata coding is defined in Supplementary Data 1. ART (anti-retroviral therapy). \*\*\*: p < 0.001, \*\*: p < 0.01, \*: p < 0.05

**Supplementary Table 9. Additional metadata correlation (Botswana)**

|                                                                        | HIV-uninfected vs HIV+ ART-treated       |         |                                           |           | HIV-uninfected vs HIV+ untreated |         |                                           |         |
|------------------------------------------------------------------------|------------------------------------------|---------|-------------------------------------------|-----------|----------------------------------|---------|-------------------------------------------|---------|
|                                                                        | All metadata available (n = 153)         |         | All expanded metadata available (n = 140) |           | All metadata available (n = 121) |         | All expanded metadata available (n = 118) |         |
|                                                                        | R <sup>2</sup>                           | P       | R <sup>2</sup>                            | P         | R <sup>2</sup>                   | P       | R <sup>2</sup>                            | P       |
| HIV-Infection                                                          | 1.17%                                    | 0.002** | 1.40%                                     | 0.0009*** | 0.98%                            | 0.11    | 0.99%                                     | 0.13    |
| Sex                                                                    | 1.01%                                    | 0.004** | 0.90%                                     | 0.038*    | 0.96%                            | 0.12    | 0.79%                                     | 0.63    |
| Age                                                                    | 0.83%                                    | 0.046*  | 0.90%                                     | 0.043*    | 1.06%                            | 0.04*   | 1.35%                                     | 0.004** |
| Race                                                                   | - Uniform (All Black African) -          |         |                                           |           |                                  |         |                                           |         |
| Ethnicity                                                              | - Uniform (All Non-Hispanic or Latino) - |         |                                           |           |                                  |         |                                           |         |
| Current ART (by class)                                                 | 1.56%                                    | 0.04*   | 1.71%                                     | 0.03*     | -                                | -       | -                                         | -       |
| On TMP-SMX Prophylaxis                                                 | - Uniform (None) -                       |         |                                           |           |                                  |         |                                           |         |
| BMI                                                                    | -                                        | -       | 0.78%                                     | 0.18      | 0.91%                            | 0.21    | 0.88%                                     | 0.35    |
| Time on ART (years)                                                    | 0.64%                                    | 0.51    | 0.71%                                     | 0.44      | -                                | -       | -                                         | -       |
| History of CVD (self-reported)                                         | 0.73%                                    | 0.18    | 0.84%                                     | 0.09      | 0.89%                            | 0.25    | 0.76%                                     | 0.76    |
| History of HLD (self-reported)                                         | 0.72%                                    | 0.17    | 0.70%                                     | 0.50      | 0.69%                            | 0.90    | 0.75%                                     | 0.77    |
| History of HLD (self-reported or determined from available data)       | 0.61%                                    | 0.68    | 0.58%                                     | 0.95      | 0.74%                            | 0.77    | 0.80%                                     | 0.59    |
| History of hypertension (self-reported)                                | 0.62%                                    | 0.60    | 0.64%                                     | 0.74      | 0.76%                            | 0.72    | 0.75%                                     | 0.80    |
| History of Type 2 DM (self-reported or determined from available data) | 0.58%                                    | 0.81    | 0.66%                                     | 0.72      | 0.78%                            | 0.67    | 0.88%                                     | 0.34    |
| History of chronic kidney disease (self-reported)                      | 0.64%                                    | 0.51    | 0.69%                                     | 0.56      | - Uniform (None) -               |         |                                           |         |
| Smoking status                                                         | 1.35%                                    | 0.31    | 1.33%                                     | 0.75      | 2.12%                            | 0.009** | 1.67%                                     | 0.50    |
| Mean Carotid Intima-Media Thickness (mm)                               | 0.58%                                    | 0.80    | 0.69%                                     | 0.58      | 0.77%                            | 0.66    | 0.89%                                     | 0.27    |
| Presence of carotid plaque                                             | 0.60%                                    | 0.71    | 0.65%                                     | 0.75      | 0.77%                            | 0.67    | 0.83%                                     | 0.53    |
| Number of carotid plaques                                              | 0.60%                                    | 0.70    | 0.65%                                     | 0.73      | 0.71%                            | 0.87    | 0.74%                                     | 0.82    |
| Duration of smoking (years)                                            | -                                        | -       | 0.99%                                     | 0.01**    | -                                | -       | 1.36%                                     | 0.003** |
| Framingham Risk Score (without laboratory component)                   | -                                        | -       | 0.68%                                     | 0.60      | -                                | -       | 0.84%                                     | 0.49    |
| Framingham Risk Score (with laboratory component)                      | -                                        | -       | 0.74%                                     | 0.33      | -                                | -       | 0.83%                                     | 0.50    |

Controlling for available metadata from Supplementary Figure 3A (Botswana) performed on unweighted UniFrac distances calculated at the ASV level. R<sup>2</sup> and p-value were obtained for each category of metadata available using a multivariate PERMANOVA analysis. When adding in metadata available for all subjects and metadata available for a substantial fraction of subjects, HIV-infection status remained significant in the comparison between HIV-uninfected and HIV-infected ART-treated subjects. HIV-infection status remained non-significant in the comparison between HIV-uninfected and HIV-infected ART-untreated subjects. Metadata coding is defined in Supplementary Data 1. ART (anti-retroviral therapy), TMP-SMX (trimethoprim-sulfamethoxazole), CVD (cardiovascular disease), HLD (hyperlipidemia), DM (diabetes mellitus). \*\*\*: p < 0.001, \*\*: p < 0.01, \*: p < 0.05



**Supplementary Table 10. Additional metadata correlation (Uganda)**

|                                                                           | HIV-uninfected vs HIV+ ART-treated       |           |                                                 |           |
|---------------------------------------------------------------------------|------------------------------------------|-----------|-------------------------------------------------|-----------|
|                                                                           | All metadata available<br>(n = 170)      |           | All expanded metadata<br>available<br>(n = 150) |           |
|                                                                           | R <sup>2</sup>                           | P         | R <sup>2</sup>                                  | P         |
| HIV-Infection                                                             | 2.13%                                    | 0.0009*** | 1.55%                                           | 0.0009*** |
| Sex                                                                       | 0.77%                                    | 0.039*    | 0.79%                                           | 0.10      |
| Age                                                                       | 0.71%                                    | 0.077     | 0.60%                                           | 0.67      |
| Race                                                                      | - Uniform (All Black African) -          |           |                                                 |           |
| Ethnicity                                                                 | - Uniform (All Non-Hispanic or Latino) - |           |                                                 |           |
| Current ART (by class)                                                    | 0.77%                                    | 0.04*     | 0.99%                                           | 0.006**   |
| On TMP-SMX Prophylaxis                                                    | 0.47%                                    | 0.93      | 0.52%                                           | 0.96      |
| BMI                                                                       | 0.62%                                    | 0.28      | 0.77%                                           | 0.11      |
| Time on ART (years)                                                       | 0.68%                                    | 0.13      | 0.73%                                           | 0.19      |
| History of CVD (self-reported)                                            | 0.49%                                    | 0.87      | 0.53%                                           | 0.93      |
| History of CVD (self-reported or determined from available data)          | 0.56%                                    | 0.50      | 0.78%                                           | 0.09      |
| History of HLD (self-reported)                                            | 0.76%                                    | 0.04*     | 0.78%                                           | 0.12      |
| History of HLD (self-reported or determined from available data)          | 0.53%                                    | 0.69      | 0.62%                                           | 0.63      |
| History of hypertension (self-reported or determined from available data) | 0.54%                                    | 0.61      | 0.67%                                           | 0.39      |
| History of Type 2 DM (self-reported or determined from available data)    | 0.76%                                    | 0.036*    | 0.96%                                           | 0.013*    |
| History of chronic kidney disease (self-reported)                         | 0.52%                                    | 0.77      | 0.60%                                           | 0.69      |
| Smoking status                                                            | 1.15%                                    | 0.47      | 1.29%                                           | 0.55      |
| Mean Carotid Intima-Media Thickness (mm)                                  | 0.50%                                    | 0.82      | 0.51%                                           | 0.97      |
| Presence of carotid plaque                                                | 0.55%                                    | 0.59      | 0.66%                                           | 0.43      |
| Number of carotid plaques                                                 | 0.69%                                    | 0.11      | 0.57%                                           | 0.81      |
| Duration of smoking (years)                                               | 0.58%                                    | 0.44      | 0.52%                                           | 0.95      |
| Framingham Risk Score (without laboratory component)                      | -                                        | -         | 0.74%                                           | 0.19      |
| Framingham Risk Score (with laboratory component)                         | -                                        | -         | 0.68%                                           | 0.35      |
| Level of schooling                                                        | -                                        | -         | 4.20%                                           | 0.13      |
| Monthly income                                                            | -                                        | -         | 0.79%                                           | 0.09      |
| Food security                                                             | -                                        | -         | 2.50%                                           | 0.74      |
| Electricity at home                                                       | -                                        | -         | 0.78%                                           | 0.11      |
| Toilet facilities at home                                                 | -                                        | -         | 2.70%                                           | 0.32      |
| Home wall material                                                        | -                                        | -         | 2.17%                                           | 0.12      |
| Home floor material                                                       | -                                        | -         | 2.16%                                           | 0.14      |

Controlling for available metadata from Supplementary Figure 3A (Uganda) performed on unweighted UniFrac distances calculated at the ASV level. R<sup>2</sup> and p-value were obtained for each category of metadata available using a multivariate PERMANOVA analysis. When adding in metadata available for all subjects and metadata available for a substantial fraction of subjects, HIV-infection status remained significant in the comparison between HIV-uninfected and HIV-infected ART-treated subjects. Metadata coding is defined in Supplementary Table 3. ART (anti-retroviral therapy), TMP-SMX (trimethoprim-sulfamethoxazole), CVD (cardiovascular disease), HLD (hyperlipidemia), DM (diabetes mellitus). \*\*\*: p < 0.001, \*\*: p < 0.01, \*: p < 0.05

**Supplementary Table 11. Demographic characteristics of subjects in U.S. cohorts**

|                                                                                                                           | HIV-uninfected<br>(n=117)  | HIV-infected ART-<br>treated<br>(n=61) | HIV-infected<br>ART-untreated<br>(n=55) | P value   |        |
|---------------------------------------------------------------------------------------------------------------------------|----------------------------|----------------------------------------|-----------------------------------------|-----------|--------|
| Gender<br>(Female/Male MSM/Male non-MSM)                                                                                  | 37/32/48                   | 9/42/10                                | 7/44/4                                  | <0.00001  |        |
| Race<br>(Black or African-American/White/<br>AmericanIndian_Alaska/<br>Asian/Multiple/Unknown)                            | 16/89/1/5/4/2              | 22/35/1/0/3/0                          | 11/37/0/2/5/0                           | 0.035     |        |
| Ethnicity<br>(Non-Hispanic or Latino/<br>Hispanic or Latino)                                                              | 107/10                     | 54/7                                   | 48/7                                    | 0.66      |        |
| Age in years (IQR)                                                                                                        | 48 (31, 55)                | 54 (47, 58)                            | 52 (38.5, 54)                           | 0.028     |        |
| Weight in kg (IQR)                                                                                                        | 80 (68.5, 89.8)<br>n = 106 | 86 (77, 95)<br>n = 57                  | 83 (74, 99)<br>n = 45                   | 0.04      |        |
| Height in cm (IQR)                                                                                                        | 175 (170, 178)<br>n = 106  | 178 (170, 183)<br>n = 57               | 175 (168, 178)<br>n = 43                | 0.08      |        |
| Body Mass Index (BMI) in kg/cm <sup>2</sup> (IQR)                                                                         | 25.5 (23, 28.4)<br>n = 106 | 27.3 (24.3, 30.1)<br>n = 57            | 27.7 (25.2, 31.6)<br>n = 42             | 0.015     |        |
| History or Diagnosis of<br>Comorbidity (n, %)<br><br>(Total n = 103/54/43 for<br>Negative/ART/ART-naïve,<br>respectively) | Hyperlipidemia             | 8 (7.8)                                | 18 (33.3)                               | 6 (14)    | 0.0002 |
|                                                                                                                           | Hypertension               | 8 (7.8)                                | 19 (35.2)                               | 10 (23.3) | 0.0001 |
|                                                                                                                           | Cardiovascular<br>Disease  | 4 (3.9)                                | 3 (5.6)                                 | 1 (2.3)   | 0.72   |
|                                                                                                                           | Diabetes                   | 6 (5.8)                                | 4 (7.4)                                 | 2 (4.7)   | 0.85   |
| Current CD4 T-cell counts in cells/ml (IQR)                                                                               | 946 (625, 1194)<br>n = 25  | 722.5 (507.2, 918)<br>n = 60           | 548 (440.8, 775)<br>n = 54              | 0.0001    |        |
| Nadir CD4 T-cell counts in cells/ml (IQR)                                                                                 | 933 (559, 1148)<br>n = 25  | 361.5 (276.5, 583)<br>n = 52           | 402 (347.5, 557)<br>n = 50              | <0.00001  |        |

For numeric variables, median and IQR values are shown. P-values for continuous and discrete variables are calculated with Kruskal-Wallis and Chi-square test, respectively. Some data were collected from less than the complete cohort, these are notated by n of the number of subjects from which they were collected.

**Supplementary Table 12. Demographic characteristics of subjects in Botswana cohorts**

|                                                              | HIV-uninfected<br>(n=80)       | HIV-infected ART-<br>treated<br>(n=73) | HIV-infected<br>ART-untreated<br>(n=41) | P value  |       |
|--------------------------------------------------------------|--------------------------------|----------------------------------------|-----------------------------------------|----------|-------|
| Gender<br>(Female/Male)                                      | 36/44                          | 38/35                                  | 22/19                                   | 0.57     |       |
| Race                                                         | - All Black African -          |                                        |                                         |          |       |
| Ethnicity<br>(Non-Hispanic or Latino/<br>Hispanic or Latino) | - All Non-Hispanic or Latino - |                                        |                                         |          |       |
| Age in years (IQR)                                           | 38 (33.8, 42)                  | 39 (36, 41)                            | 37 (34, 42)                             | 0.23     |       |
| Weight in kg (IQR)                                           | 66.5 (56, 78.2)                | 68 (58.5, 76.2)                        | 61 (55, 72)                             | 0.20     |       |
| Height in cm (IQR)                                           | 167 (161.8, 173)               | 166 (160.8, 174)                       | 165 (160, 172)                          | 0.70     |       |
| Body Mass Index (BMI) in kg/cm <sup>2</sup> (IQR)            | 23.3 (20.5, 28)                | 23.9 (20.6, 27.8)                      | 22.1 (19.8, 26)                         | 0.38     |       |
| History or Diagnosis of<br>Comorbidity (n, %)                | Hyperlipidemia                 | 22 (27.5)                              | 28 (38.4)                               | 6 (14.6) | 0.026 |
|                                                              | Hypertension                   | 9 (11.2)                               | 11 (15.1)                               | 1 (2.4)  | 0.11  |
|                                                              | Cardiovascular<br>Disease      | 3 (3.8)                                | 3 (4.1)                                 | 4 (9.8)  | 0.32  |
|                                                              | Diabetes                       | 4 (5)                                  | 1 (1.4)                                 | 3 (7.3)  | 0.27  |
| Current CD4 T-cell counts in cells/ml (IQR)                  | NA                             | 493 (389, 694)                         | 361 (158, 531)                          | 0.0002   |       |
| Nadir CD4 T-cell counts in cells/ml (IQR)                    | NA                             | 117 (73, 180)                          | NA                                      | -        |       |

For numeric variables, median and IQR values are shown. P-values for continuous and discrete variables are calculated with Kruskal-Wallis and Chi-square test, respectively.

**Supplementary Table 13. Demographic characteristics of subjects in Uganda cohorts**

|                                                              | HIV-uninfected<br>(n=80)       | HIV-infected ART-treated<br>(n=90) | P value   |      |
|--------------------------------------------------------------|--------------------------------|------------------------------------|-----------|------|
| Gender<br>(Female/Male)                                      | 39/41                          | 46/44                              | 0.88      |      |
| Race                                                         | - All Black African -          |                                    |           |      |
| Ethnicity<br>(Non-Hispanic or Latino/<br>Hispanic or Latino) | - All Non-Hispanic or Latino - |                                    |           |      |
| Age in years (IQR)                                           | 50 (46, 54)                    | 49 (45, 51)                        | 0.10      |      |
| Weight in kg (IQR)                                           | 58 (52.8, 69)                  | 60 (54, 64.8)                      | 0.96      |      |
| Height in cm (IQR)                                           | 161.5 (156.8, 169)             | 162 (158, 169.8)                   | 0.39      |      |
| Body Mass Index (BMI) in kg/cm <sup>2</sup> (IQR)            | 22.2 (19.5, 25)                | 21.6 (19.9, 24.4)                  | 0.58      |      |
| History or Diagnosis of<br>Comorbidity (n, %)                | Hyperlipidemia                 | 14 (17.5)                          | 11 (12.2) | 0.45 |
|                                                              | Hypertension                   | 22 (27.5)                          | 15 (16.7) | 0.13 |
|                                                              | Cardiovascular<br>Disease      | 25 (31.2)                          | 24 (26.7) | 0.62 |
|                                                              | Diabetes                       | 7 (8.8)                            | 5 (5.6)   | 0.61 |
| Current CD4 T-cell counts in cells/ml (IQR)                  | NA                             | 430 (336, 552.8)                   | -         |      |
| Nadir CD4 T-cell counts in cells/ml (IQR)                    | NA                             | 123 (85.2, 173.2)                  | -         |      |

For numeric variables, median and IQR values are shown. P-values for continuous and discrete variables are calculated with Kruskal-Wallis and Chi-square test, respectively.

**Supplementary Table 14. Additional metadata correlation (MSM)**

|                                                                        | HIV-uninfected vs HIV+ ART-treated |           |                                          |           | HIV-uninfected vs HIV+ untreated |           |                                          |           |
|------------------------------------------------------------------------|------------------------------------|-----------|------------------------------------------|-----------|----------------------------------|-----------|------------------------------------------|-----------|
|                                                                        | All metadata available (n = 74)    |           | All expanded metadata available (n = 62) |           | All metadata available (n = 76)  |           | All expanded metadata available (n = 65) |           |
|                                                                        | R <sup>2</sup>                     | P         | R <sup>2</sup>                           | P         | R <sup>2</sup>                   | P         | R <sup>2</sup>                           | P         |
| HIV-Infection                                                          | 4.93%                              | 0.0009*** | 3.28%                                    | 0.0009*** | 4.34%                            | 0.0009*** | 4.53%                                    | 0.0009*** |
| Age                                                                    | 1.35%                              | 0.31      | 1.73%                                    | 0.19      | 1.69%                            | 0.065     | 1.96%                                    | 0.046*    |
| Race                                                                   | 7.04%                              | 0.0009*** | 6.85%                                    | 0.098     | 6.09%                            | 0.026*    | 7.18%                                    | 0.008**   |
| Ethnicity                                                              | 1.39%                              | 0.26      | 1.39%                                    | 0.63      | 1.21%                            | 0.57      | 1.12%                                    | 0.97      |
| Current ART (by class)                                                 | -                                  | -         | 3.18%                                    | 0.31      | -                                | -         | -                                        | -         |
| BMI                                                                    | -                                  | -         | 1.91%                                    | 0.107     | -                                | -         | 1.88%                                    | 0.068     |
| Time on ART (years)                                                    | -                                  | -         | 3.97%                                    | 0.0009*** | -                                | -         | -                                        | -         |
| History of CVD (self-reported or determined from available data)       | -                                  | -         | 1.69%                                    | 0.22      | -                                | -         | 2.01%                                    | 0.037*    |
| History of HLD (self-reported or determined from available data)       | -                                  | -         | 2.14%                                    | 0.042*    | -                                | -         | 1.71%                                    | 0.15      |
| History of hypertension (self-reported)                                | -                                  | -         | 1.96%                                    | 0.09      | -                                | -         | 1.52%                                    | 0.37      |
| History of Type 2 DM (self-reported or determined from available data) | -                                  | -         | 1.78%                                    | 0.18      | -                                | -         | 1.49%                                    | 0.37      |

Controlling for available metadata from Figure 3A (MSM subjects) performed on unweighted UniFrac distances calculated at the ASV level. R<sup>2</sup> and p-value were obtained for each category of metadata available using a multivariate PERMANOVA analysis. When adding in metadata available for all subjects and metadata available for a substantial fraction of subjects, HIV-infection status remained significant in the comparison between MSM HIV-uninfected and HIV-infected ART-treated subjects as well as between MSM HIV-uninfected and HIV-infected ART-untreated subjects. Metadata coding is defined in Supplementary Data 1. ART (anti-retroviral therapy), TMP-SMX (trimethoprim-sulfamethoxazole), CVD (cardiovascular disease), HLD (hyperlipidemia), DM (diabetes mellitus). \*\*\*: p < 0.001, \*\*: p < 0.01, \*: p < 0.05
