# Supplementary material for: HIV-associated gut microbial alterations are dependent on host and geographic context
Source: PubMed Central journal article supplement (PMC10844288; doi:10.1038/s41467-023-44566-4), 2024-02-05
Supplement: 41467_2023_44566_MOESM7_ESM.pdf [file 41467_2023_44566_MOESM7_ESM.pdf]

**Supplementary Table 15. Sexual behavior characteristics of individuals in cohorts from the U.S.**

|                                                                                                                    | HIV Uninfected<br>(n=51) | HIV Infected<br>ART-treated<br>(n=20) | HIV Infected<br>ART-untreated<br>(n=12) |
|--------------------------------------------------------------------------------------------------------------------|--------------------------|---------------------------------------|-----------------------------------------|
| Gender<br>(Female/Male MSM/Male non-MSM)                                                                           | 6/25/20                  | 11/3/6                                | 7/2/3                                   |
| Partner Gender<br>(Men/Women/Both/No Answer)                                                                       | 22/1/2/26                | 3/4/0/13                              | 2/1/1/8                                 |
| Receptive anal intercourse in the past 2 days<br>(all without a condom, all Male MSM)<br>n, (%)                    | 3, (6%)                  | 0                                     | 0                                       |
| Receptive anal intercourse in the past 30<br>days (all Male MSM)<br>n, (%)<br>(Protected/Unprotected/Both/Unknown) | 11, (22%)<br>(2/6/3/0)   | 3, (15%)<br>(1/2/0/0)                 | 3, (25%)<br>(0/1/1/1)                   |
| Rectal insertion in the past 2 days<br>n, (%)<br>(Female/Male MSM/Male non-MSM)                                    | 6, (12%)<br>(0/6/0)      | 2, (10%)<br>(1/1/0)                   | 1, (8%)<br>(0/1/0)                      |
| Rectal insertion in the past 30 days<br>n, (%)<br>(Female/Male MSM/Male non-MSM)                                   | 10, (20%)<br>(0/10/0)    | 3, (15%)<br>(1/2/0)                   | 3, (25%)<br>(0/3/0)                     |
| How often do you use a condom?<br>(always/sometimes/never)                                                         | 15/13/23                 | 9/9/2                                 | 3/8/1                                   |

Results from a survey collected on a subset (n = 83) of the Boston Cohort characterizing sexual behavior, divided by HIV phenotype. All responses are subsetting further by preferred gender and whether the subject self-identifies as MSM (men-who-have-sex-with-men). Additional information pertaining to the responses are contained in corresponding parentheses.
